# Supplementary material
Source: PubMed Central journal article supplement (PMC2596280)
Supplement: NIHMS75653-supplement-3.pdf [file NIHMS75653-supplement-3.pdf]

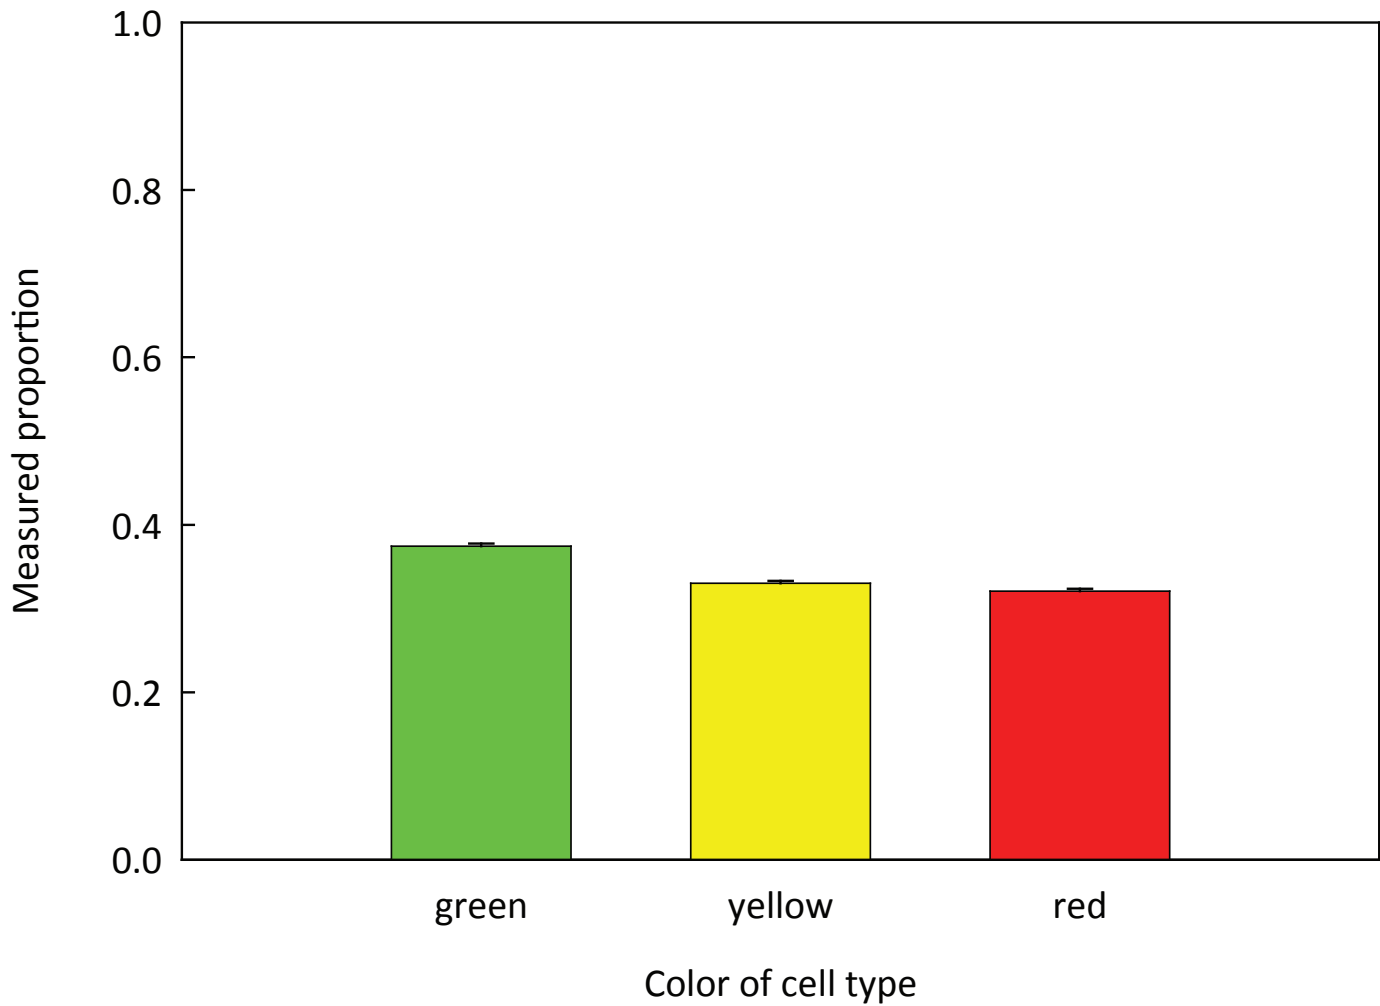

**Supplementary Figure 2.** FACS measurement of approximately equal numbers of parental strains expressing GFP, YFP, and DsRED. The average and standard deviation are based on triplicate measurements of 3 separate mixtures.
