# Supplementary material
Source: PubMed Central journal article supplement (PMC2596280)
Supplement: NIHMS75653-supplement-4.pdf [file NIHMS75653-supplement-4.pdf]

A

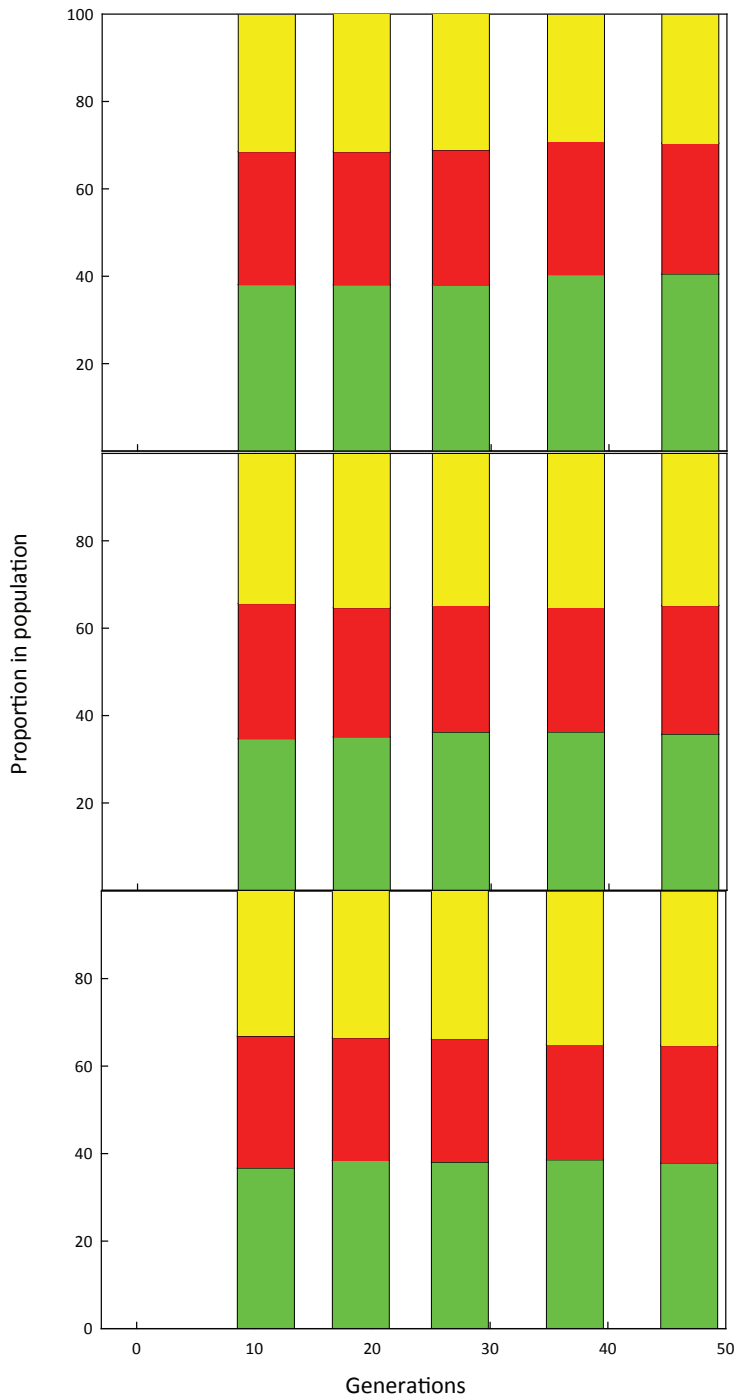

B

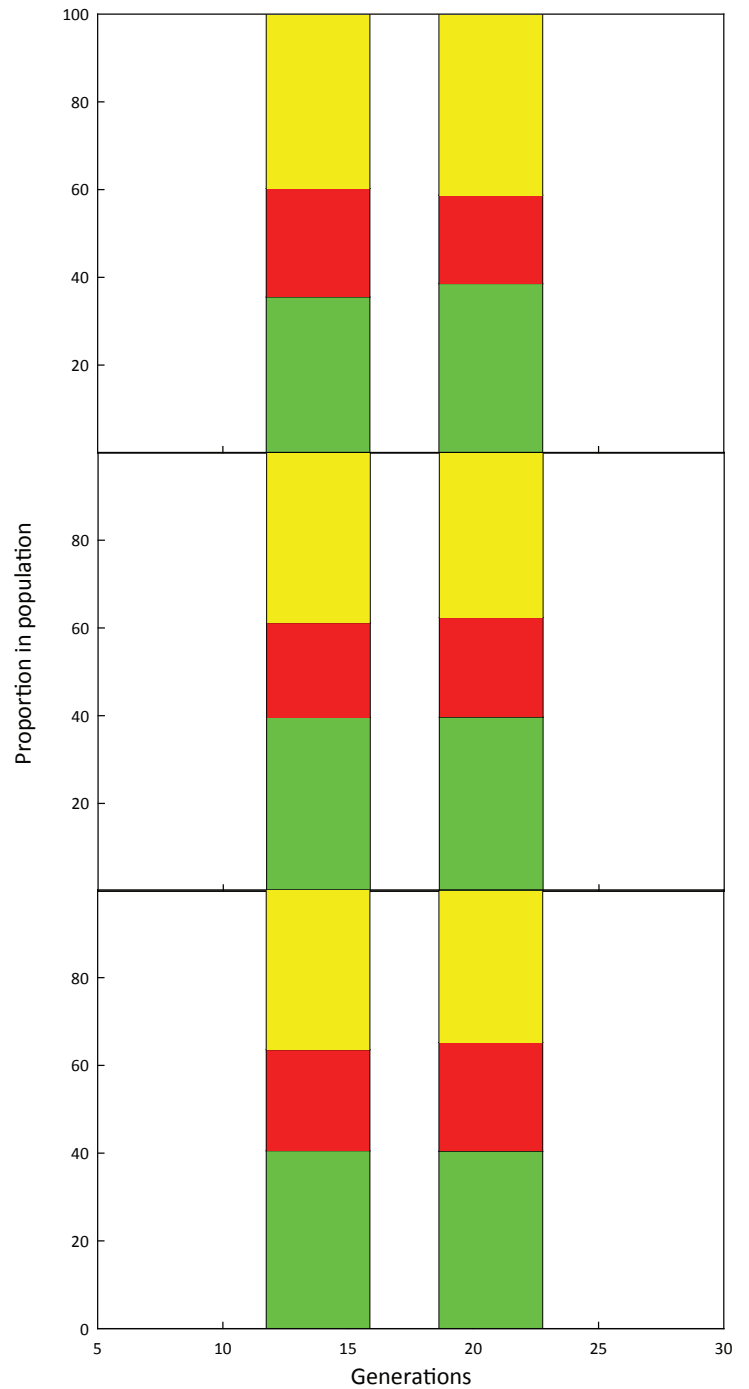

**Supplementary Figure 3.** FACS measurements of changes in frequency of the different fluorescently expressing cells during A) a serial batch transfer experiment, and B) a short-term chemostat experiment. Each experiment was repeated in triplicate. The three parental strains expressing GFP, YFP, and DsRED were mixed in at equal proportions at the start of the experiment. The green, yellow and red bars represent the proportion of the population
