# Supplementary material
Source: PubMed Central journal article supplement (PMC2596280)
Supplement: NIHMS75653-supplement-5.pdf [file NIHMS75653-supplement-5.pdf]

A

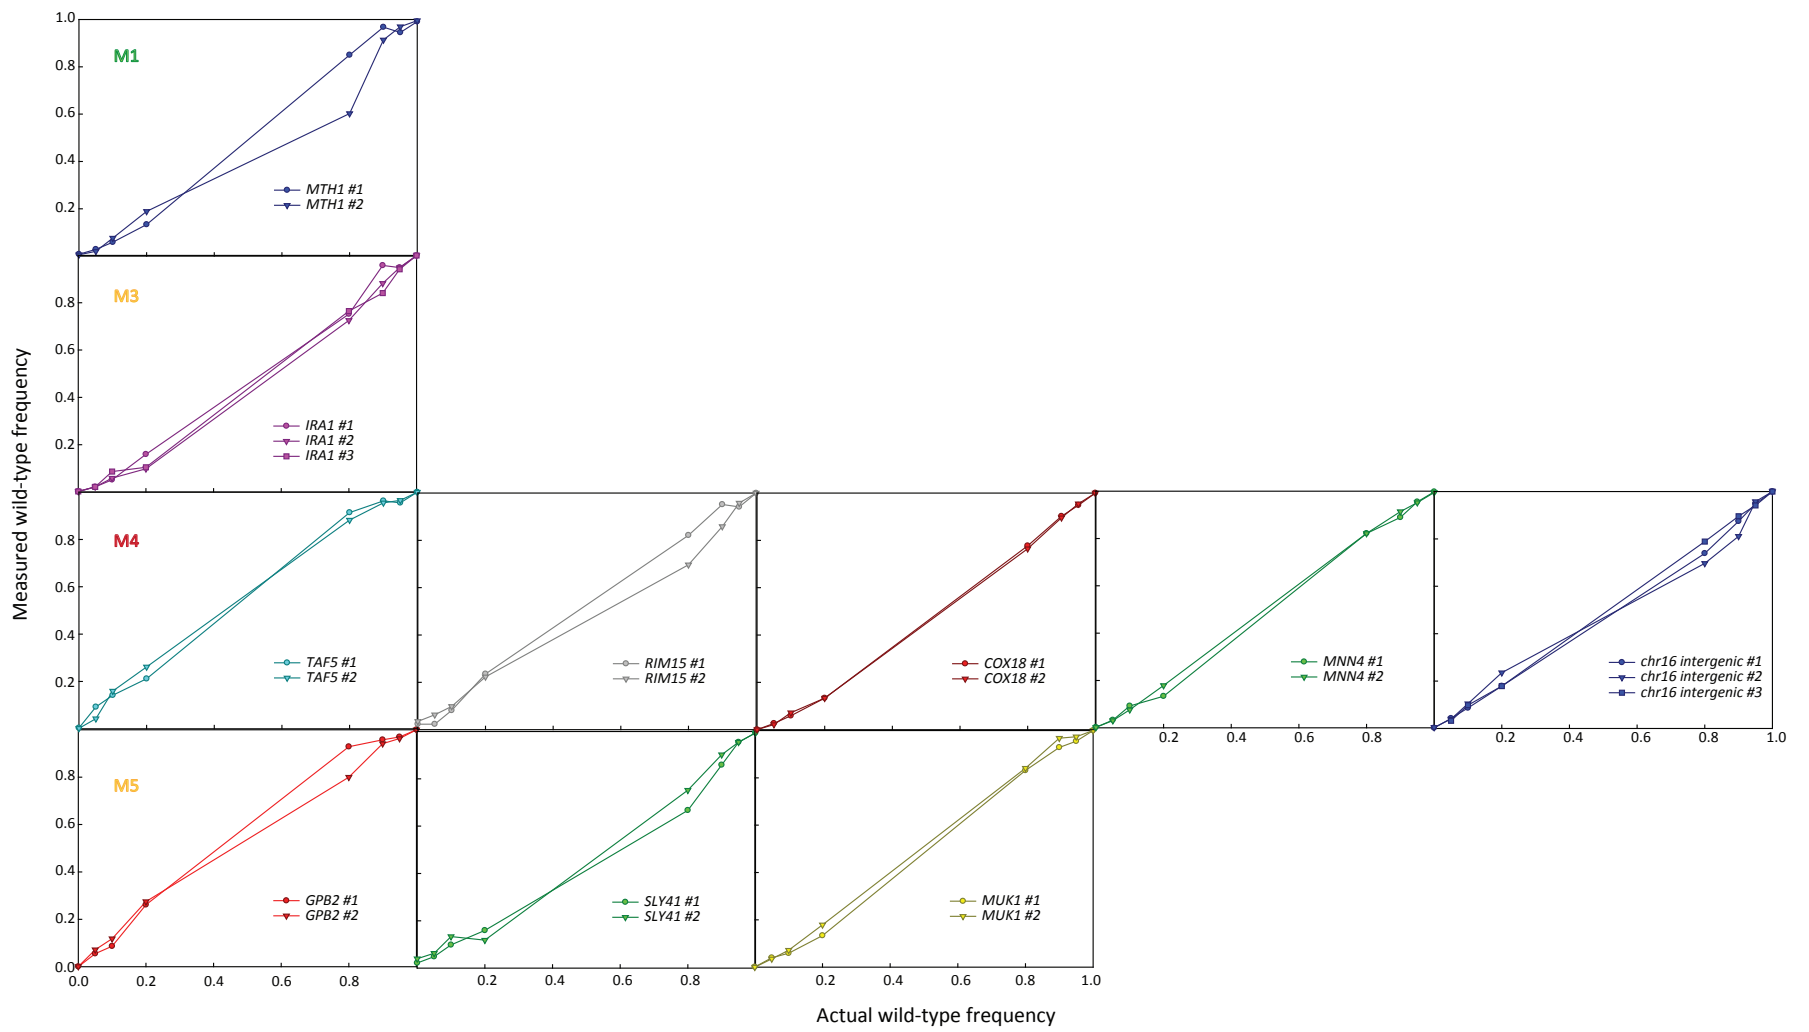

B

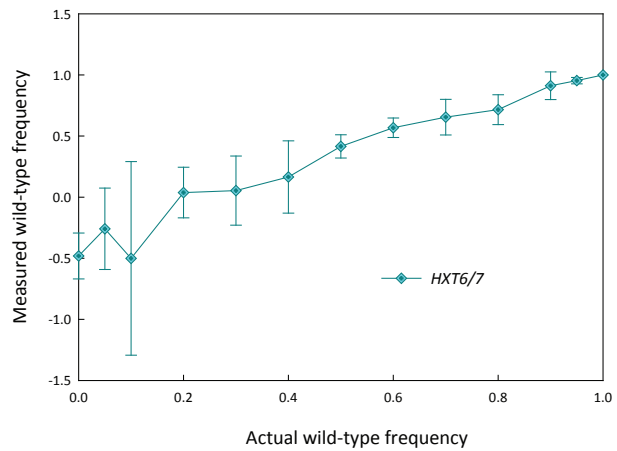

**Supplementary Figure 4.** Allelic frequency test results for a) the different allelic specific primers and b) the HXT6/7 amplification.
