# Supplementary material
Source: PubMed Central journal article supplement (PMC2596280)
Supplement: NIHMS75653-supplement-6.pdf [file NIHMS75653-supplement-6.pdf]

## Supplementary tables

| <b>Strain</b> | <b>Generation</b> | <b>Subpopulation</b> |
|---------------|-------------------|----------------------|
| M1            | 56                | Green                |
| M2            | 91                | Red                  |
| M3            | 196               | Yellow               |
| M4            | 256               | Red                  |
| M5            | 385               | Yellow               |

### **Supplementary Table 1. Description of the adaptive clones analyzed.**

The adaptive clones were isolated at the generations and from the subpopulations specified. See Figure 1A in paper for population structure and details of isolation.
