# Supplementary material
Source: PubMed Central journal article supplement (PMC2596280)
Supplement: NIHMS75653-supplement-7.pdf [file NIHMS75653-supplement-7.pdf]

| <b>Strain</b> | <b>Genotype</b>                                                 | <b>Source</b> |
|---------------|-----------------------------------------------------------------|---------------|
| FY2           | Mat $\alpha$ , <i>ura3-52</i> , <i>gal+</i> in S288c background |               |
| GSY1135       | FY2 <i>YBR209W</i> ::Act1p-DsRED.T1.N1-Act1t- <i>URA3</i>       | this work     |
| GSY1136       | FY2 <i>YBR209W</i> ::Act1p-GFP-Act1t- <i>URA3</i>               | this work     |
| GSY1137       | FY2 <i>YBR209W</i> ::Act1p-YFP-Act1t- <i>URA3</i>               | this work     |

**Supplementary Table 2.** List of strains used.
