# Supplementary material
Source: PubMed Central journal article supplement (PMC2596280)
Supplement: NIHMS75653-supplement-8.pdf [file NIHMS75653-supplement-8.pdf]

| Sequencing Primers used for verification of genotypes |                        |                          |                                          |
|-------------------------------------------------------|------------------------|--------------------------|------------------------------------------|
| Primer                                                | Sequence               |                          |                                          |
| Chr1 39603 for                                        | GATTGTGATTCATTGGCAGG   |                          |                                          |
| Chr1 39603 rev                                        | TCCTTCCTTAGCTTTGGTAC   |                          |                                          |
| Chr2 616436 for                                       | GAACGACGCTACTAAATCGC   |                          |                                          |
| Chr2 616436 rev                                       | GTTTCTCCCCGCTAGGCC     |                          |                                          |
| Chr4 1014688 for                                      | CCTTGGGAATTTGGAGCTC    |                          |                                          |
| Chr4 1014688 rev                                      | GAATCAAACCTAACCCAGCGC  |                          |                                          |
| Chr6 73424 for                                        | CTAGTCCAGGATCCTGATC    |                          |                                          |
| Chr6 73424 rev                                        | CTTGAAGCACGTTGGTATC    |                          |                                          |
| Chr7 617106 for                                       | TTCTGCCTCTTCTTGTCTC    |                          |                                          |
| Chr7 617106 rev                                       | TGAGGTTGTGGAGCTGTTG    |                          |                                          |
| Chr11 64696 for                                       | AGGGTCCTTATCAAACATTTG  |                          |                                          |
| Chr11 64696 rev                                       | TTTAGATTTTGGTTCGACTATG |                          |                                          |
| Chr15 893328 for                                      | AGGGCTACTGTTTCTAGCG    |                          |                                          |
| Chr15 893328 rev                                      | TGTTGGATTTGCTTCCATCG   |                          |                                          |
| Chr16 422264 for                                      | TGAAACTACATGAAATCATGAC |                          |                                          |
| Chr16 422264 rev                                      | AGATGCTGAAGATCGTGAAG   |                          |                                          |
| Chr16 912519 for                                      | TTCTTCCCCTGATAGATAAG   |                          |                                          |
| Chr16 912519 rev                                      | CATCATACGAAAGTATGTCTG  |                          |                                          |
| Primers for Allele Frequency Determination            |                        |                          |                                          |
| Gene / location                                       | Primer                 | Sequence                 | Comment                                  |
| <i>GPB2</i>                                           | chr1 yellow wt for     | GGGCATGCGTTGAAGAATCC     | common forward primer                    |
|                                                       | chr1 yellow mut rev    | AATGGAATCCCAACAATTATCTC  | mutant allele-specific reverse primer    |
|                                                       | chr1 yellow rev        | GACCGCACAGTACGATTACAG    | wild-type allele-specific reverse primer |
| <i>SLY41</i>                                          | chr15 yellow wt for    | TCTTACTGCCATGTGTTGACC    | wild-type allele-specific forward primer |
|                                                       | chr15 yellow mut for   | CTCTTACTGCCATGTGTTGACA   | mutant allele-specific forward primer    |
|                                                       | chr15 yellow rev       | TCGAACATCGTTATTACAATTCC  | common reverse primer                    |
| <i>MUK1</i>                                           | chr16 yellow wt for    | CAGTAGAGTCTCATTGCCATC    | wild-type allele-specific forward primer |
|                                                       | chr16 yellow mut for   | CAGTAGAGTCTCATTGCCATA    | mutant allele-specific forward primer    |
|                                                       | chr16 yellow rev       | CTTGGATAGTAGGAGTCACG     | common reverse primer                    |
| <i>IRA1</i>                                           | chr2 yellow wt for new | GCCAAATGATACTGTAGAAGATC  | wild-type allele-specific forward primer |
|                                                       | chr2 yellow mut for    | GCCAAATGATACTGTAGAAGATT  | mutant allele-specific forward primer    |
|                                                       | chr2 yellow rev        | TTGAATCTGCAAAAGCATTGGC   | common reverse primer                    |
| <i>MTH1</i>                                           | chr4 green wt for      | GTCTTTTTAAGTTGGACTGTTG   | wild-type allele-specific forward primer |
|                                                       | chr4 green mut for     | GGTCTTTTTAAGTTGGACTGTTA  | mutant allele-specific forward primer    |
|                                                       | chr4 green rev         | TTAAATATAGCAGTAGAGGCAC   | common reverse primer                    |
| <i>TAF5</i>                                           | chr2 red wt for        | TAAGGAATAAATGGCATTCTTAC  | wild-type allele-specific forward primer |
|                                                       | chr2 red mut for       | ATAAGGAATAAATGGCATTCTTAA | mutant allele-specific forward primer    |
|                                                       | chr2 red rev           | TAGCGAAGATGGTATTATTAATG  | common reverse primer                    |
| <i>RIM15</i>                                          | chr6 red wt for        | GAAATGGTTCCTGATCTTTACC   | wild-type allele-specific forward primer |
|                                                       | chr6 red mut for       | TGAAATGGTTCCTGATCTTTACA  | mutant allele-specific forward primer    |
|                                                       | chr6 red rev           | GGAATTGATCTAACAAAGCATTG  | common reverse primer                    |
| <i>COX18</i>                                          | chr7 red wt for        | CACATATACCATGGATAGTGCT   | wild-type allele-specific forward primer |
|                                                       | chr7 red mut for       | CACATATACCATGGATAGTGCA   | mutant allele-specific forward primer    |
|                                                       | chr7 red rev           | AGTTCTTGTGTTTCAAAATTCTC  | common reverse primer                    |
| <i>MNN4</i>                                           | chr11 red wt for       | GACTACATTAGATCAAGTTACCA  | wild-type allele-specific forward primer |
|                                                       | chr11 red mut for      | ACTACATTAGATCAAGTTACCG   | mutant allele-specific forward primer    |
|                                                       | chr11 red rev          | ATGTTGAAAAGTGAAAAATTCCTG | common reverse primer                    |
| chr16 intergenic                                      | chr16 red wt for       | ACGATTCGAAATTAATCTTTTCTT | wild-type allele-specific forward primer |
|                                                       | chr16 red mut for      | CGATTCGAAATTAATCTTTTCTG  | mutant allele-specific forward primer    |
|                                                       | chr16 red rev new      | TTCTTTTCTGTGTTCTTAGTGTC  | common reverse primer                    |
| <i>HXT6/7</i>                                         | hxt6 for               | AATGGCTTATCATCGTGAGCC    |                                          |
|                                                       | hxt6 rev               | CCTCATGGGTTCCACCATCT     |                                          |

Supplementary Table 3. Primers used.
